# Supplementary material for: Insect Detection and Classification Based on an Improved Convolutional Neural Network
Source: MDPI journal article supplement (doi:10.3390/s18124169), 2018-11-27
Supplement: s1 [file s1]

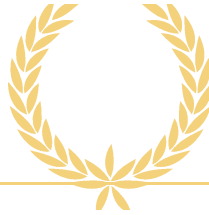

We certify that the following article

## Insect detection and classification based on improved convolutional neural network

Denan Xia, Peng Chen \*, Jun Zhang, Bing Wang \*

has undergone English language editing by MDPI. The text has been checked for correct use of grammar and common technical terms, and edited to a level suitable for reporting research in a scholarly journal.

MDPI uses experienced, native English speaking editors. Full details of the editing service can be found at

► [www.mdpi.com/authors/english](http://www.mdpi.com/authors/english).

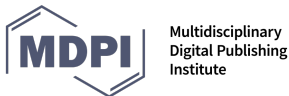

Basel, November 2018

Martyn Rittman, Ph.D.  
English Editing Manager  
[englishediting@mdpi.com](mailto:englishediting@mdpi.com)  
<http://www.mdpi.com/authors/english>
